# Supplementary material for: The PEC performance of BiVO4 was enhanced by preparing the CoFeBi/BiVO4 photoanode using an ultrafast photoassisted electrodeposition method
Source: Royal Society of Chemistry journal article supplement (doi:10.1039/d3ce00953j), 2023-01-01
Supplement: d3ce00953j1.pdf [file d3ce00953j1.pdf]

**The PEC performance of BiVO<sub>4</sub> was enhanced by preparing the  
CoFeB<sub>i</sub>/BiVO<sub>4</sub> photoanode using an ultrafast photoassisted  
electrodeposition method**

<sup>a</sup> College of Chemistry and Chemical Engineering, Northwest Normal University,  
Lanzhou 730070, China

<sup>b</sup> School of Geography and Environment Science, Northwest Normal University,  
Lanzhou 730070, China

<sup>c</sup> Qinghai Provincial Key Laboratory of Nanomaterials and Nanotechnology, Qinghai  
Minzu University, Qinghai 810007, China

<sup>d</sup> School of Environment Science and Engineering, Chang'an University, Xi'an  
710060, China

\*Corresponding author. Tel: +86 931 7972677; Fax: +86 931 7972677.

\*Corresponding author. E-mail: baiyan226@163.com(Y.Bai); pjhhj@sohu.com (J.  
Peng); wangqizhao@163.com, qizhaosjtu@gmail.com (Q. Wang)

## Preparation of BiVO<sub>4</sub>

To prepare the BiVO<sub>4</sub> film, a typical three-electrode setup was used. The working electrode was made of FTO conductive glass, the opposite electrode was a platinum sheet and the reference electrode was an Ag/AgCl electrode. First, in a clean beaker, 3.32 g of potassium iodide (KI) was weighed and mixed with 50 mL of distilled water at room temperature. Then, 1 M nitric acid (HNO<sub>3</sub>) solution was gradually added to adjust the pH to 1.65. Into the KI solution with the adjusted pH, 0.9701 g of bismuth nitrate pentahydrate (Bi(NO<sub>3</sub>)<sub>3</sub>·5H<sub>2</sub>O) was added. This mixture was labeled as solution A. Then, In another clean beaker, 0.498 g of 1,4-benzoquinone (C<sub>6</sub>H<sub>4</sub>O<sub>2</sub>) was added to 20 mL of absolute ethanol at room temperature. This mixture was labeled as solution B. The contents of solution B were added drop by drop into solution A while stirring with a magnetic stirrer. As the addition progressed, the solution gradually changed in color from clear orange to orange-red. Stirring was continued for approximately 20 minutes to ensure thorough mixing. The deposition of the obtained solution was carried out using a three-electrode cyclic voltammetry (CV) technique. The potential range utilized was -0.13 V to 0 V, and the scanning rate was set to 5 mV/s. The BiOI film was then rinsed with deionized water and dried. Onto the prepared BiOI film, 100  $\mu$ L of a 0.2 M VO(acac)<sub>2</sub> (DMSO) solution was dropped. The film was subsequently annealed at 450 °C for 2 hours, using a heating rate of 2 °C

/min. Finally, the samples were immersed in a 1.0 M sodium hydroxide solution to remove any excess vanadium pentoxide. After that, they were rinsed with distilled water and dried in an oven to obtain pure  $\text{BiVO}_4$  electrode material.

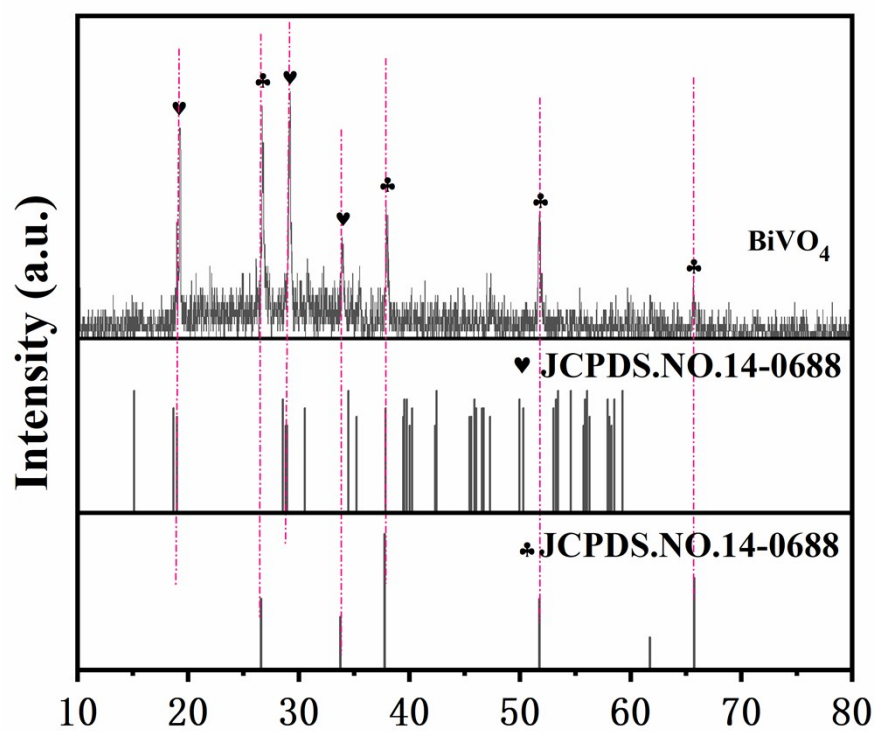

Fig. S1. XRD images of  $\text{BiVO}_4$ .

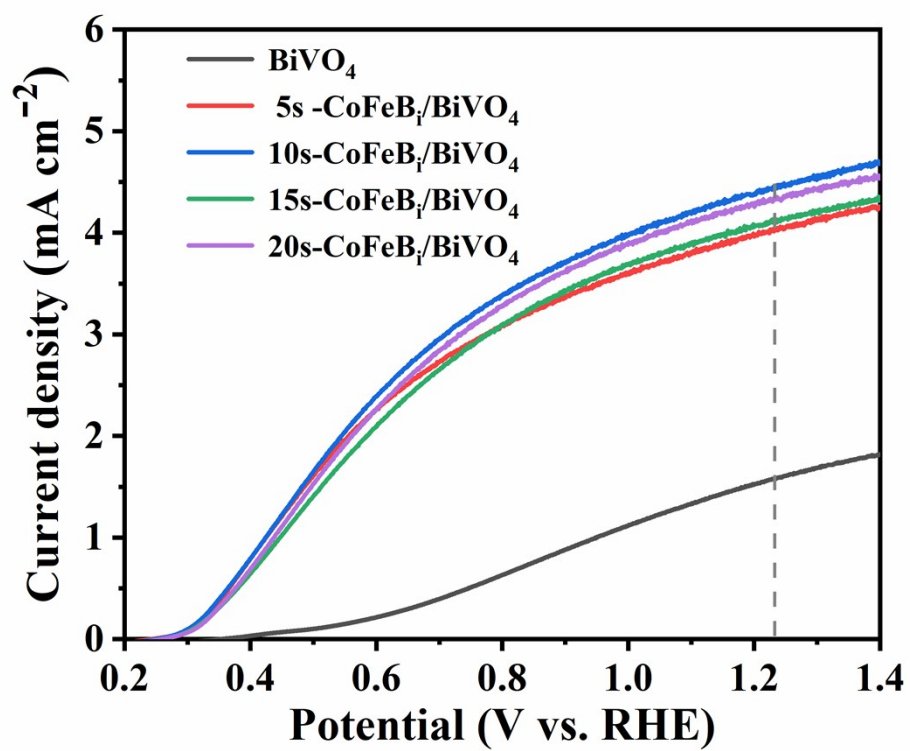

Fig. S2. LSV curves of CoFeB<sub>i</sub>/BiVO<sub>4</sub> with different deposition time.

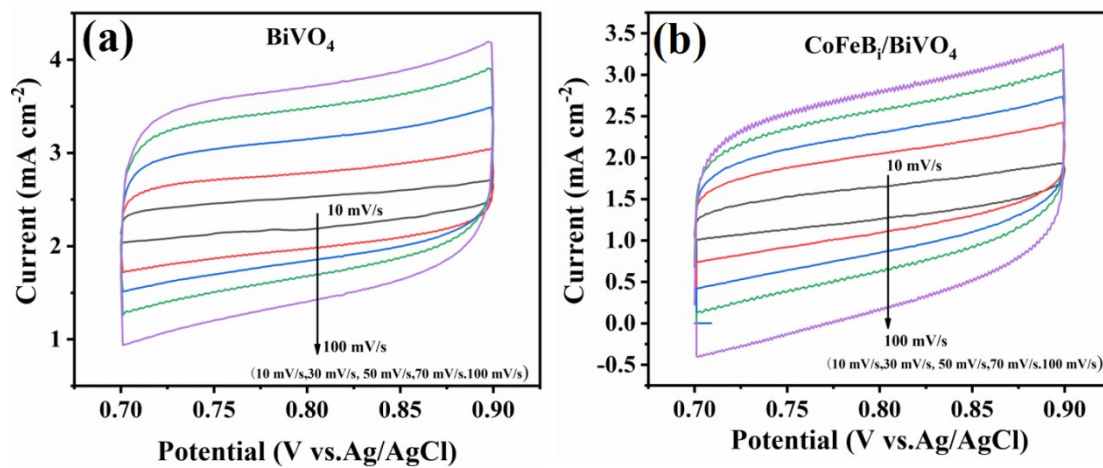

Fig. S3. CV of photoanodes performed at different scan rates in the non-Faradaic potential range.

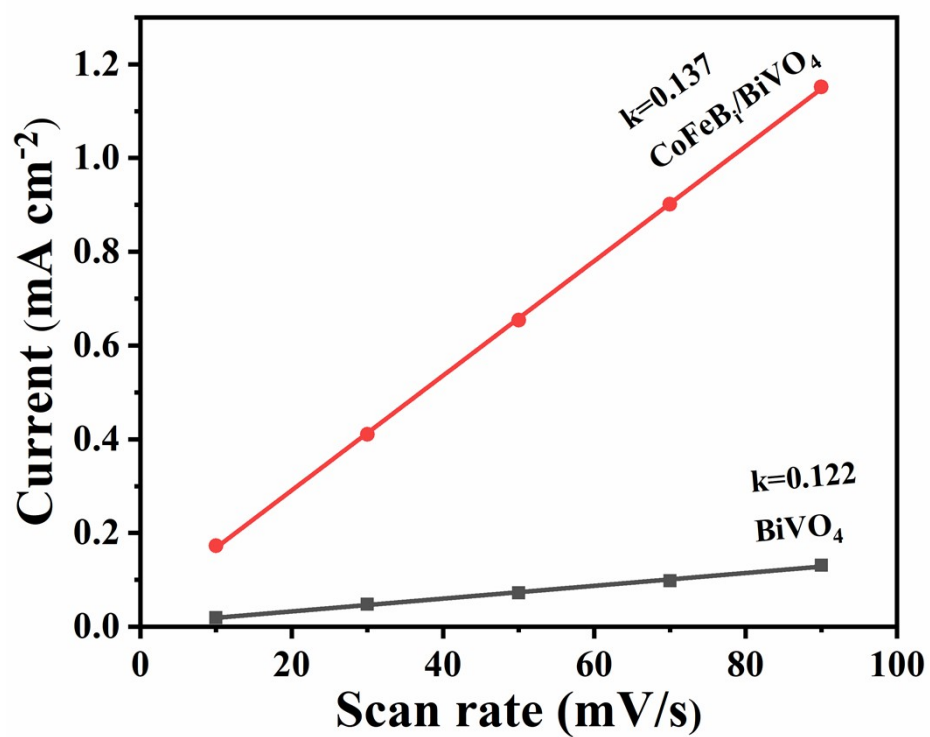

Fig. S4. Relationship between current density difference and scan rate of BiVO<sub>4</sub> and CoFeB<sub>i</sub>/BiVO<sub>4</sub> photoanodes.

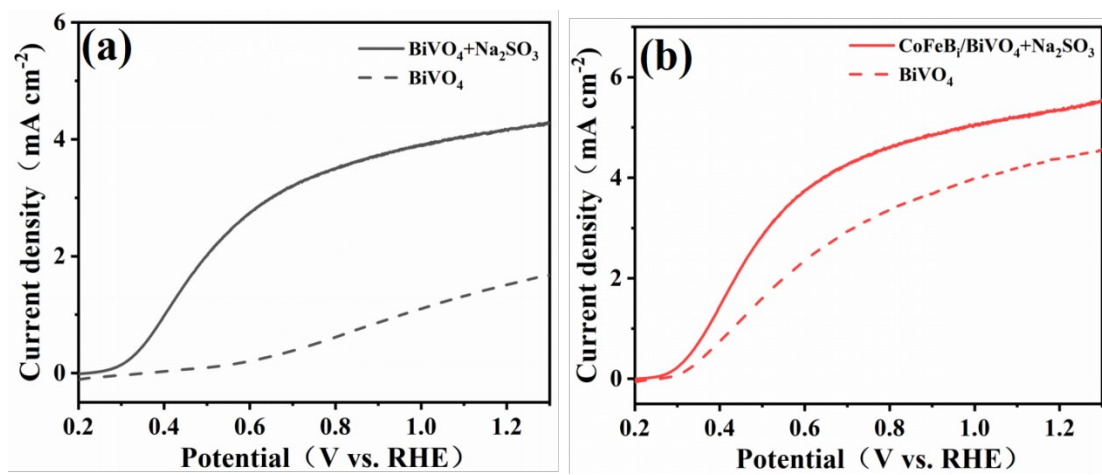

Fig. S5. BiVO<sub>4</sub> and CoFeBi/BiVO<sub>4</sub> electrodes measured by in 1 M Na<sub>2</sub>SO<sub>3</sub> solution of linear sweep voltammetric curves (a), (b).

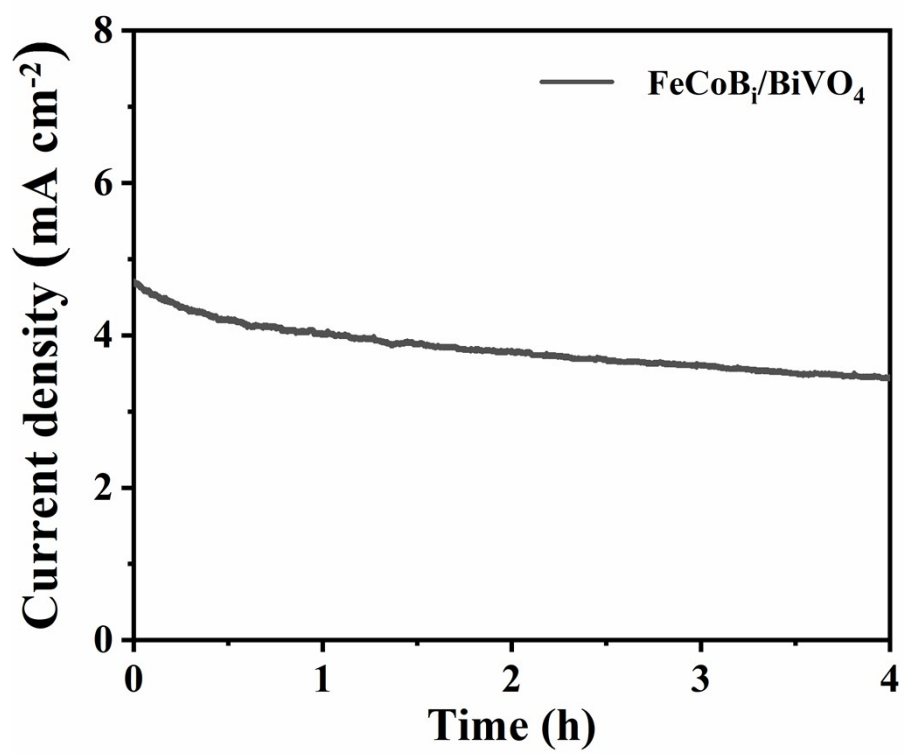

Fig. S6. The stability test curves of CoFeBi/BiVO<sub>4</sub> electrodes.

Table.S1. The charge transfer resistance ( $R_{ct}$ ) of electrodes.

| Sample                                | $R_s$ ( $\Omega$ ) | $R_{ct}$ ( $\Omega$ ) |
|---------------------------------------|--------------------|-----------------------|
| BiVO <sub>4</sub>                     | 18.86              | 496.1                 |
| FeB <sub>i</sub> /BiVO <sub>4</sub>   | 28.77              | 203.4                 |
| CoB <sub>i</sub> /BiVO <sub>4</sub>   | 26.73              | 168.4                 |
| CoFeB <sub>i</sub> /BiVO <sub>4</sub> | 27.79              | 140.6                 |

Table. S2. Comparison of the CoFeB<sub>i</sub>/BiVO<sub>4</sub> with the recent BiVO<sub>4</sub> photoanodes for PEC water oxidation under AM 1.5 G (100 mW cm<sup>-2</sup>) illumination.

| Photoelectrode                         | Electrolyte | Performance<br>(at 1.23 V vs. RHE) | Ref.      |
|----------------------------------------|-------------|------------------------------------|-----------|
| F/Mo:BiVO <sub>4</sub>                 | 0.1M KPi    | 1.45 mA cm <sup>-2</sup>           | 1         |
| BiVO <sub>4</sub> /NdCo <sub>3</sub>   | 0.1M KPi    | 2.25 mA cm <sup>-2</sup>           | 2         |
| FeOOH/Ni-BiVO <sub>4</sub>             | 0.1M KPi    | 3.02 mA cm <sup>-2</sup>           | 3         |
| Zr-CoF <sub>2</sub> /BiVO <sub>4</sub> | 0.5 M KPi   | 3.6 mA cm <sup>-2</sup>            | 4         |
| BiVO <sub>4</sub> /CuPc/FeOOH          | 0.1 M KPi   | 3.65 mA cm <sup>-2</sup>           | 5         |
| CoFeB <sub>i</sub> /BiVO <sub>4</sub>  | 0.5 M KPi   | 4.4 mA cm <sup>-2</sup>            | This work |

## References

1. M. Rohloff, B. Anke, O. Kasian, S. Y. Zhang, M. Lerch, C. Scheu and A. Fischer, *Acs Applied Materials & Interfaces*, 2019, **11**, 16430-16442.
2. G. D. Gao, R. Chen, Q. J. Wang, D. W. F. Cheung, J. Zhao and J. S. Luo, *Acs Applied Energy Materials*, 2023, **6**, 4027-4034.
3. M. H. Chen, X. B. Chang, C. Li, H. Q. Wang and L. C. Jia, *Journal of Colloid and Interface Science*, 2023, **640**, 162-169.
4. K. Y. Chen, L. Zhang, X. Huang, F. C. Zhang, G. Q. Zhu and Q. Z. Wang, *Journal of Alloys and Compounds*, 2023, **963**, 9.
5. M. M. Fan, Z. Y. Tao, Q. Zhao, J. P. Li, G. Liu and C. Zhao, *Adv. Mater. Technol.*, 2023, DOI: 10.1002/admt.202201835, 9.
